# Supplementary material
Source: publisher site journal article supplement (https://www.dovepress.com/article/361634)
Supplement: Supplementary file 1 [file get_supplementary_file.php]

Supplemental Table 1. Demographic and clinical information of subjects

| Sample    | Sex    | Age | Drug use | BP1 (mmHg) |     | Anti-hypertension drug regimen                                                                                                                              | BP2 (mmHg) |     |
|-----------|--------|-----|----------|------------|-----|-------------------------------------------------------------------------------------------------------------------------------------------------------------|------------|-----|
|           |        |     |          | SBP        | DBP |                                                                                                                                                             | SBP        | DBP |
| Ctrl-DS1  | Male   | 46  | -        | 190        | 120 | Losartan Potassium 62.5 mg qd                                                                                                                               | 133        | 90  |
| Ctrl-DS2  | Male   | 41  | -        | 160        | 110 | Irbesartan 150 mg qd                                                                                                                                        | 130        | 95  |
| Ctrl-DS3  | Male   | 35  | -        | 170        | 100 | Amlodipine besylate 5 mg qd                                                                                                                                 | 110        | 80  |
| Ctrl-DS4  | Male   | 43  | -        | 146        | 96  | Irbesartan 150 mg qd                                                                                                                                        | 121        | 68  |
| Ctrl-DS5  | Male   | 45  | -        | 168        | 117 | Losartan Potassium 31.25 mg qd                                                                                                                              | 120        | 80  |
| Ctrl-DS6  | Male   | 39  | -        | 156        | 101 | Perindopril 8 mg qd                                                                                                                                         | 110        | 70  |
| Ctrl-DS7  | Male   | 43  | -        | 190        | 120 | Nifedipine 30 mg qd                                                                                                                                         | 130        | 70  |
| Ctrl-DS8  | Male   | 41  | -        | 180        | 120 | Irbesartan and hydrochlorothiazide 82.5 mg qd                                                                                                               | 135        | 95  |
| Ctrl-DS9  | Male   | 52  | -        | 160        | 110 | Irbesartan 150 mg qd                                                                                                                                        | 100        | 70  |
| Ctrl-DS10 | Male   | 56  | -        | 160        | 110 | Irbesartan 150 mg qd                                                                                                                                        | 112        | 76  |
| Ctrl-DS11 | Male   | 55  | -        | 165        | 115 | Valsartan and Amlodipine 85 mg qd                                                                                                                           | 116        | 74  |
| Ctrl-DS12 | Male   | 52  | -        | 150        | 90  | Irbesartan 150 mg qd                                                                                                                                        | 110        | 75  |
| Ctrl-DS13 | Male   | 47  | -        | 150        | 110 | Amlodipine Mesylate 5 mg qd, Irbesartanhydrochlorothiazide 162.5 mg qd                                                                                      | 110        | 70  |
| Ctrl-DS14 | Female | 50  | -        | 170        | 120 | Lacidipine 4 mg qd, Bisoprolol 2.5mg qd                                                                                                                     | 130        | 90  |
| Ctrl-DS15 | Female | 50  | -        | 170        | 110 | Irbesartan 150 mg qd, Bisoprolol 2.5 mg qd, Amlodipine Mesylate 5 mg qd                                                                                     | 120        | 70  |
| Ctrl-DS16 | Female | 67  | -        | 180        | 110 | Amlodipine besylate 5 mg qd                                                                                                                                 | 130        | 90  |
| IDU-DS1   | Male   | 34  | +        | 158        | 109 | Irbesartan 5 mg qd                                                                                                                                          | 128        | 78  |
| IDU-DS2   | Male   | 60  | +        | 176        | 105 | Amlodipine Mesylate 5 mg qd, Irbesartan 5 mg qd                                                                                                             | 130        | 90  |
| IDU-DS3   | Male   | 53  | +        | 170        | 100 | Amlodipine Mesylate 5 mg qd                                                                                                                                 | 135        | 85  |
| IDU-DS4   | Male   | 55  | +        | 190        | 140 | Amlodipine Mesylate 5 mg bid                                                                                                                                | 145        | 103 |
| IDU-DS5   | Male   | 40  | +        | 149        | 100 | Irbesartan 150 mg qd                                                                                                                                        | 120        | 70  |
| IDU-DS6   | Male   | 60  | +        | 158        | 117 | Amlodipine Mesylate 5 mg qd, Irbesartan 5 mg qd, Perindopril 8 mg qd                                                                                        | 120        | 80  |
| IDU-DS7   | Male   | 57  | +        | 155        | 105 | Perindopril 8 mg qd                                                                                                                                         | 110        | 70  |
| IDU-DS8   | Male   | 56  | +        | 190        | 120 | Amlodipine besylate 5 mg qd, Irbesartan 5 mg qd                                                                                                             | 121        | 76  |
| IDU-DS9   | Male   | 43  | +        | 180        | 120 | irbesartan 150 mg qd, Hydrochlorothiazide 25 mg qd                                                                                                          | 135        | 95  |
| IDU-DS10  | Male   | 48  | +        | 169        | 103 | Nifedipine 30 mg bid, Rbesartan 150 mg qd, Hydrochlorothiazide 25 mg qd                                                                                     | 130        | 80  |
| IDU-DS11  | Male   | 38  | +        | 180        | 140 | Amlodipine Mesylate 5 mg qd, Irbesartan 5 mg qd, Perindopril 8 mg qd                                                                                        | 124        | 88  |
| IDU-DS12  | Male   | 47  | +        | 181        | 126 | Amlodipine Mesylate 5 mg qd                                                                                                                                 | 140        | 80  |
| IDU-DS13  | Male   | 50  | +        | 170        | 120 | Amlodipine Mesylate 5 mg qd, Irbesartan 5 mg qd,                                                                                                            | 135        | 90  |
| IDU-DS14  | Male   | 41  | +        | 182        | 100 | Amlodipine besylate 5 mg qd                                                                                                                                 | 121        | 76  |
| IDU-DS15  | Male   | 58  | +        | 200        | 115 | Nifedipine 30mg bid, Irbesartan 150 mg qd, Hydrochlorothiazide 25 mg qd                                                                                     | 140        | 88  |
| IDU-DS16  | Male   | 44  | +        | 165        | 103 | Amlodipine Mesylate 5 mg qd                                                                                                                                 | 120        | 74  |
| IDU-DS17  | Male   | 60  | +        | 161        | 100 | Amlodipine Mesylate 5 mg qd, Irbesartan 5 mg qd                                                                                                             | 120        | 70  |
| IDU-DS18  | Male   | 63  | +        | 180        | 120 | Amlodipine Mesylate 5 mg qd                                                                                                                                 | 134        | 80  |
| IDU-DS19  | Male   | 52  | +        | 150        | 120 | Nifedipine 30 mg bid, Irbesartan 150 mg qd, Metoprolol Tartrate 6.25 mg bid                                                                                 | 128        | 86  |
| IDU-DS20  | Male   | 73  | +        | 259        | 159 | Metoprolol Tartrate 12.5 mg bid, Hydrochlorothiazide 25 mg qd, Rbesartan 150 mg bid, Spironolactone 20 mg bid, Nifedipine 30 mg twice/day                   | 190        | 118 |
| IDU-DR1   | Male   | 44  | +        | 150        | 100 | Amlodipine Mesylate 5 mg qd, Irbesartan 5 mg qd                                                                                                             | 135        | 85  |
| IDU-DR2   | Male   | 53  | +        | 170        | 100 | Amlodipine Mesylate 5 mg qd, Irbesartan 5 mg qd                                                                                                             | 140        | 90  |
| IDU-DR3   | Male   | 55  | +        | 150        | 90  | Amlodipine Mesylate 5 mg bid                                                                                                                                | 130        | 80  |
| IDU-DR4   | Male   | 50  | +        | 175        | 110 | Amlodipine Mesylate 5 mg qd, Irbesartan 5 mg qd                                                                                                             | 141        | 88  |
| IDU-DR5   | Male   | 49  | +        | 160        | 100 | Amlodipine Mesylate 5 mg qd                                                                                                                                 | 135        | 80  |
| IDU-DR6   | Male   | 46  | +        | 160        | 120 | Irbesartan 150 mg qd                                                                                                                                        | 134        | 89  |
| IDU-DR7   | Male   | 48  | +        | 150        | 120 | Amlodipine Mesylate 5 mg qd                                                                                                                                 | 130        | 80  |
| IDU-DR8   | Male   | 51  | +        | 168        | 112 | Amlodipine Mesylate 5 mg qd, Irbesartan 5 mg qd                                                                                                             | 140        | 90  |
| IDU-DR9   | Male   | 51  | +        | 160        | 110 | Irbesartan 150 mg qd, Hydrochlorothiazide 25 mg qd                                                                                                          | 130        | 95  |
| IDU-DR10  | Male   | 51  | +        | 225        | 140 | Metoprolol Tartrate 50 mg bid, Perindopril 8 mg qd, Hydrochlorothiazide 25 mg qd, Rbesartan 150 mg bid, Amlodipine Mesylate 5 mg qd, Indapamide 1 tablet qd | 201        | 125 |
| IDU-DR11  | Male   | 58  | +        | 240        | 140 | Irbesartanhydrochlorothiazide 150 mg qd, Metoprolol Tartrate 25 mg bid, Nifedipine 30 mg bid, Perindopril 8 mg qd                                           | 220        | 130 |
| IDU-DR12  | Male   | 44  | +        | 154        | 110 | Nifedipine 30mg qd                                                                                                                                          | 150        | 110 |

Ctrl-DS: Control-drug-sensitive (Drug abuse(-) indicates individuals without drug-use history had high blood pressure and were sensitive to anti-hypertensive medications); IDU-DS: Injection drug user with drug-sensitive (Drug abuse (+) individuals are sensitive to anti-hypertensive drugs); IDU-DR: Intravenous drug-user with drug-resistant (Drug abuse (+) individuals with resistant to anti-hypertension drugs); BP1 : blood pressure before taking anti-hypertension drugs; BP2 : blood pressure after taking anti-hypertension drugs; SBP: systolic blood pressure; DBP: diastolic blood pressure
